# Supplementary material for: Surface Functionalization of Exposed Core Glass Optical Fiber for Metal Ion Sensing
Source: MDPI journal article supplement (doi:10.3390/s19081829), 2019-04-17
Supplement: s1 [file s1]

## Supporting Information

### Surface Functionalization of Exposed Core Glass Optical Fiber for Metal Ion Sensing

Akash Bachhuka <sup>1,\*</sup>, Sabrina Heng <sup>1</sup>, Krasimir Vasilev <sup>2,3</sup>, Roman Kostecki <sup>1</sup>, Andrew Abell <sup>1</sup> and Heike Ebendorff-Heidepriem <sup>1,\*</sup>

<sup>1</sup> ARC Centre of Excellence for Nanoscale BioPhotonics, Institute for Photonics and Advanced Sensing, School of Physical Sciences, The University of Adelaide, Adelaide, SA, 5005, Australia; sabrina.heng@adelaide.edu.au (S.H.); roman.kostecki@adelaide.edu.au (R.K.); andrew.abell@adelaide.edu.au (A.A.)

<sup>2</sup> Future Industries Institute, University of South Australia, Krasimir Vasilev SA 5095, Australia; krasimir.vasilev@unisa.edu.au

<sup>3</sup> School of Engineering, University of South Australia, Krasimir Vasilev SA 5095, Australia;

\* Correspondence: akash.bachhuka@adelaide.edu.au (A.B.); heike.ebendorff@adelaide.edu.au (H.E.-H.)

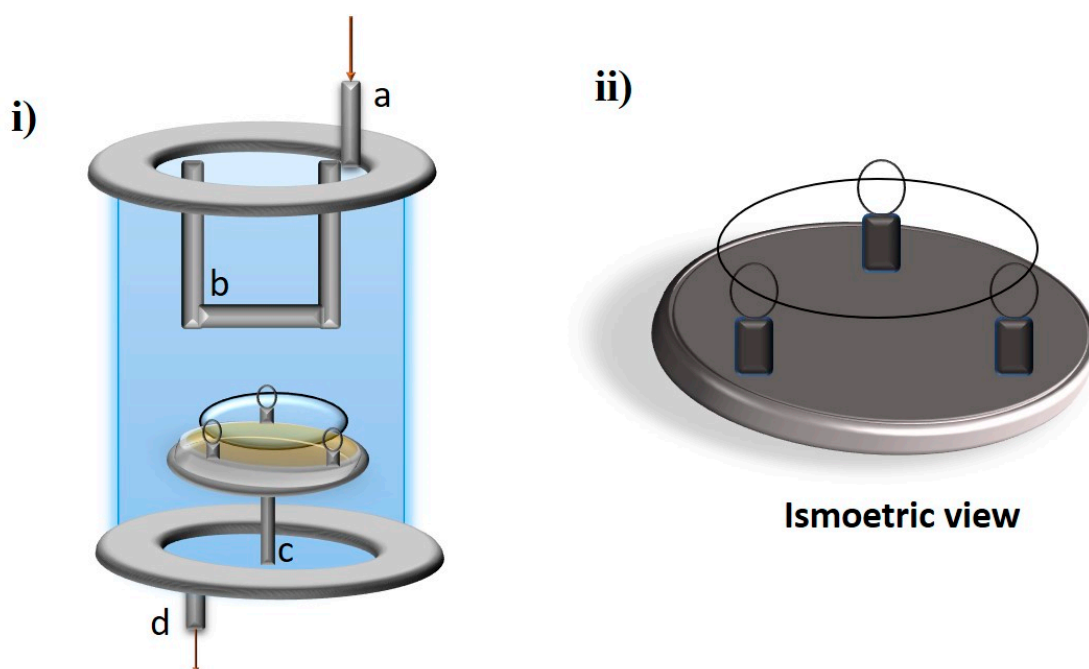

**Figure S1.** i) Schematic of plasma reactor with an additional holder for suspending fiber a) monomer inlet b) RF cathode c) RF anode with attached holder d) monomer outlet ii) Schematic of custom-built fiber holder (isometric view).

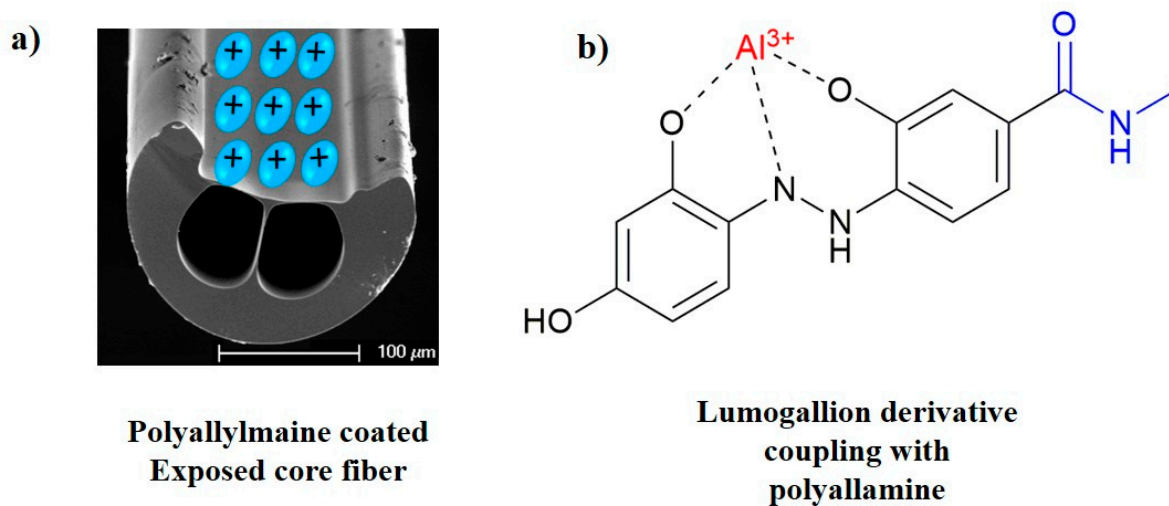

**Figure S2.** a) Schematic showing exposed core fiber (ECF) coated with plasma polymerized allylamine. b) Simplified version of lumogallion derivative coupling with plasma polymerized ECF. (Adapted from Reference 14)

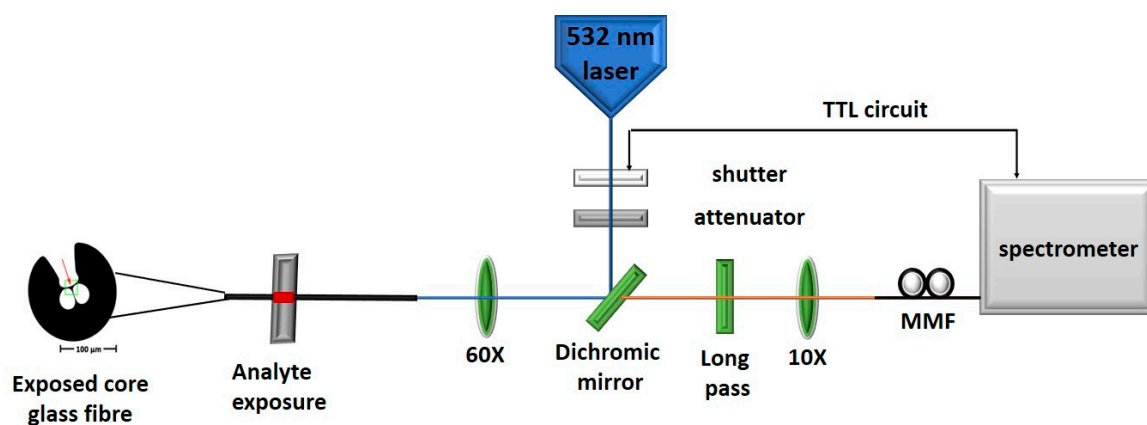

**Figure S3.** Schematic of the optical setup used to measure fluorescence from functionalized exposed core fiber (ECF) when exposed with the  $\text{Al}^{3+}$  ions. A 532 nm laser was used for alignment and for all measurements. The fibers were exposed to  $\text{Al}^{3+}$  ions by immersing a part of the fiber, as is demonstrated in the above figure.
